# Supplementary material
Source: PubMed Central journal article supplement (PMC3606709)

SUPPLEMENTAL TABLE 1: Observed Values of Outcome Measures During Continuation Treatment

| Primary Outcomes                                                            | Paroxetine + PE |      |      | Placebo + PE   |      |      |
|-----------------------------------------------------------------------------|-----------------|------|------|----------------|------|------|
|                                                                             | N <sup>a</sup>  | Mean | SD   | N <sup>a</sup> | Mean | SD   |
| <b>Clinician-Administered PTSD Scale</b>                                    |                 |      |      |                |      |      |
| Week 10                                                                     | 13              | 21.5 | 19.9 | 13             | 35.6 | 31.3 |
| Week 14                                                                     | 11              | 31.7 | 23.2 | 11             | 27.7 | 19.0 |
| Week 18                                                                     | 11              | 30.4 | 24.6 | 10             | 27.0 | 23.9 |
| Week 22                                                                     | 10              | 30.4 | 30.7 | 11             | 27.9 | 21.1 |
|                                                                             |                 |      |      |                |      |      |
|                                                                             | No./N           | %    |      | No/N           | %    |      |
| <b>Remission</b>                                                            |                 |      |      |                |      |      |
| Week 10                                                                     | 8/13            | 61.5 |      | 3/13           | 23.1 |      |
| Week 14                                                                     | 3/9             | 33.3 |      | 2/10           | 20.0 |      |
| Week 18                                                                     | 4/9             | 42.9 |      | 3/9            | 33.3 |      |
| Week 22                                                                     | 5/9             | 55.6 |      | 4/10           | 40.0 |      |
|                                                                             |                 |      |      |                |      |      |
| Secondary Outcomes                                                          | Paroxetine + PE |      |      | Placebo + PE   |      |      |
|                                                                             | No./N           | %    |      | No/N           | %    |      |
| <b>Response</b>                                                             |                 |      |      |                |      |      |
| Week 10                                                                     | 12/13           | 92.3 |      | 7/13           | 53.8 |      |
| Week 14                                                                     | 6/9             | 66.7 |      | 8/10           | 80.0 |      |
| Week 18                                                                     | 7/9             | 77.8 |      | 5/9            | 55.6 |      |
| Week 22                                                                     | 6/9             | 66.7 |      | 7/10           | 70.0 |      |
|                                                                             |                 |      |      |                |      |      |
|                                                                             | N <sup>a</sup>  | Mean | SD   | N <sup>a</sup> | Mean | SD   |
| <b>Hamilton Rating Scale for Depression</b>                                 |                 |      |      |                |      |      |
| Week 10                                                                     | 13              | 7.7  | 3.7  | 14             | 11.4 | 6.7  |
| Week 14                                                                     | 11              | 6.9  | 5.0  | 10             | 8.1  | 5.8  |
| Week 18                                                                     | 10              | 7.8  | 6.4  | 11             | 8.8  | 6.9  |
| Week 22                                                                     | 10              | 8.2  | 7.1  | 11             | 7.7  | 7.7  |
|                                                                             |                 |      |      |                |      |      |
| <b>Quality of Life Enjoyment and Satisfaction Questionnaire<sup>b</sup></b> |                 |      |      |                |      |      |
| Week 10                                                                     | 9               | 67.9 | 12.7 | 10             | 54.8 | 22.3 |
| Week 22                                                                     | 9               | 57.4 | 18.1 | 8              | 54.5 | 28.1 |

Abbreviations: PE, Prolonged Exposure Therapy

<sup>a</sup>Sample sizes vary by time point and measure due to attrition and missing data.

<sup>b</sup>Higher scores represent better quality of life.

SUPPLEMENTAL FIGURE 1: Clinician-Administered PTSD Scale (CAPS) Scores During Continuation Treatment, By Group with Standard Deviation Bars

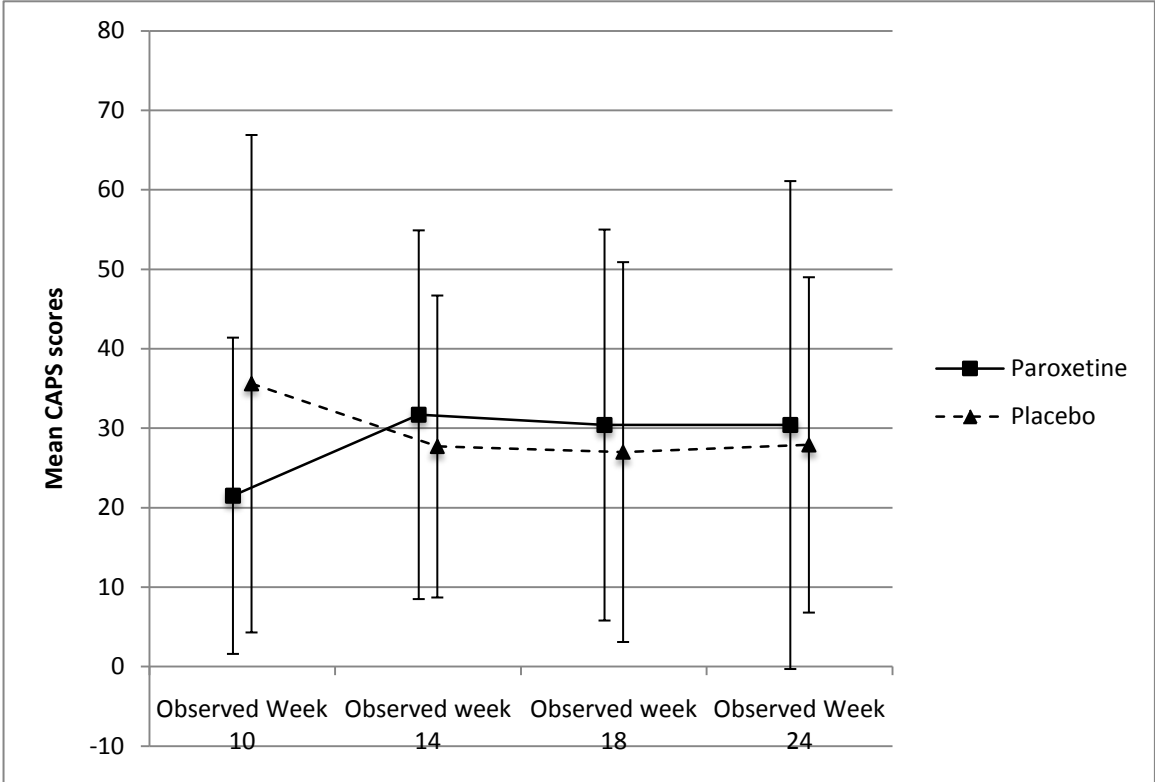

SUPPLEMENTAL FIGURE 2: Remission Rates During Continuation Treatment, By Group

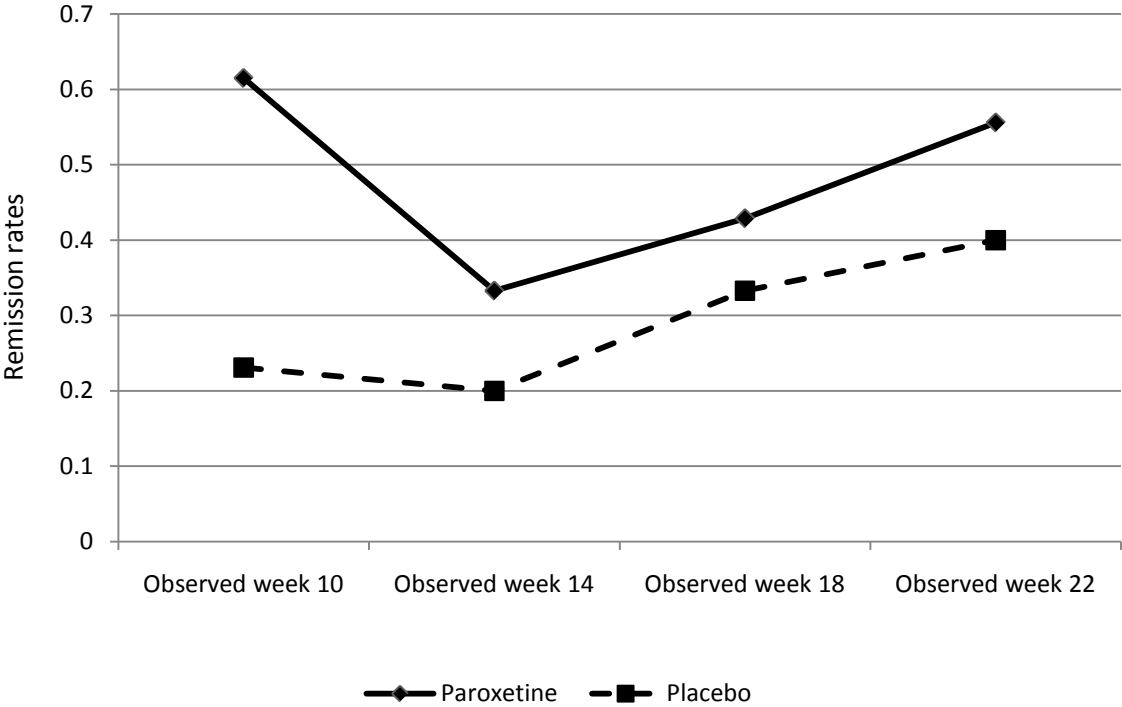

Supplement: NIHMS448232-supplement-Table_and_Figs.pdf [file NIHMS448232-supplement-Table_and_Figs.pdf]
